# Supplementary material
Source: bioRxiv or medRxiv preprint supplement (https://www.medrxiv.org/highwire/filestream/70018/field_highwire_adjunct_files/0/19010512-1.pdf)
Supplement: Supplementary file [file 19010512-1.pdf]

**Altered subcortical emotional salience processing differentiates Parkinson’s patients with and without psychotic symptoms**

Knolle F., Garofalo, S., Viviani R., Justicia, A, Ermakova, A.O., Blank H., Arrondo, G., Ramachandra, P., Tudor-Sfetea, C., Bunzeck, N., Duezel, E., Robbins, T.W., Barker, R.A, Fletcher, P.C., and Murray, G.K.

***fMRI activation to emotional salience: Multivariate analysis without controlling for covariates***

The multivariate test revealed a significant group effect on brain activation in response to negative emotional salience within the ROIs, controlling for resting CBF in these ROIs respectively, Pillai’s  $V=0.36$ ,  $F(8,98)=2.67$   $p=.011$ . Tests of between-subject effects revealed significant group effects bilaterally in the amygdala,  $F(2,51)=4.67$   $p=.014$ , partial  $\eta^2=.16$ , 76.1% power and hippocampus,  $F(2,51)=3.15$   $p=.047$ , partial  $\eta^2=.11$ , 59.4% power as well as the striatum,  $F(2,51)= 3.24$   $p=.048$ , partial  $\eta^2=.11$ , 59.2% power.

***Supplementary Table 1: Statistical comparison between the correlations***

|                                      | <b>Correlation between</b>         | <b>PD without psychotic symptoms</b> | <b>Healthy controls</b> |
|--------------------------------------|------------------------------------|--------------------------------------|-------------------------|
| <b>PD without psychotic symptoms</b> | LED and BOLD activation in         | <b>Z, p</b>                          | N.A.                    |
|                                      | - Bilateral amygdala               | 2.62, 0.009                          |                         |
|                                      | - Bilateral hippocampus            | 2.29, 0.022                          |                         |
|                                      | - Substantia nigra/VTA             | 2.13, 0.03                           |                         |
|                                      | - striatum                         | 2.15, 0.03                           |                         |
|                                      | LED and psychiatric symptom scores |                                      | N.A.                    |
| - BDI                                | 2.41, 0.02                         |                                      |                         |
| - AES                                | 2.43, 0.02                         |                                      |                         |
| - GAF                                | -1.4, 0.08*                        |                                      |                         |
|                                      | BDI and resting CBF in             |                                      |                         |
|                                      | - Bilateral amygdala               | 1.26, 0.22                           | 1.6, 0.055*             |
|                                      | - Bilateral hippocampus            | 1.11, 0.26                           | 1.87, 0.03*             |
|                                      | - Substantia nigra/VTA             | 0.75, 0.45                           | 2.28, 0.02              |

\*one-tailed

## ***'Jumping to conclusion' behaviour in a reduced sample***

### *Task description*

In order to test a possibly impaired top-down decision-making mechanisms, we wanted to test 'jumping to conclusion' behaviour in the participants of this study. The task is described in detail in (Ermakova *et al*, 2019). In this task, participants were told that two lakes, a golden and a black lake, contain golden and black fish with a ratio of 40:60 and 60:40 respectively. Participants have to draw out a sequence of fish and are then asked to make a decision about the specific lake the fish are coming from. The task consisted of four blocks with increasing difficulty: In block 1 participants had to guess the lake after however many fish they drew and then got feedback. In block 2 a reward for correct guessing was introduced (100 points) and a loss (-100 points) for wrong guessing. In block 1 and 2 participants could draw up to 20 fish. In block 3, a cost for every extra fish after the first one was introduced (-5 points) was deducted from the possible winning of 100 points. Block 4 was similar to block 3, however the information sampling cost increased incrementally (first fish would be 0, then -5 points, then -15, -20 etc.). The more fish that were sampled, the more points were lost. Our measures of interest were 'draws to decision' (DTD) and probability of correct decisions (probability correct). Unfortunately, the data set is incomplete; we were successful in collecting data from 12 of 23 PD patients without psychosis, 5 of 15 patients with psychotic symptoms, and 18 of 19 controls subjects.

### *Analysis and results*

We applied a repeated measure ANOVA across the four blocks controlling for LED and Mini-Mental-State Examination (MMSE) score. We run one repeated measure analysis for DTDs and one for probability correct.

Exploring DTD, we found a marginally significant group effect ( $F(2,30)=2.725$ ,  $p=.082$ , 50%power), and significant covariate effect for MMSE ( $F(1,30)=7.556$ ,  $p=.01$ , 75.8%power). We explored the group effect in a post hoc analysis and found that PD patients with psychotic symptoms undertook significantly less sampling (with therefore less information) than PD without psychotic symptoms ( $p=.029$ ) which was also marginally ( $p=.054$ ) less than that seen in controls (Mean number of draws: PD with psychotic symptoms: 2.92 (SE=1.8), PD without psychotic symptoms: 7.47 (SE=1.1), controls: 7.34 (SE=1.0)).

For the probability of making a correct choice (probability correct), we found a significant group effect ( $F(2,30)=4.617$ ,  $p=.020$ , 72.2%power), and a significant covariate effect for MMSE ( $F(1,30)=7.692$ ,  $p=.019$ , 66.9%power). We explored the group effect in a posthoc analysis and found that PD patients with psychotic symptoms had a significantly lower probability of correctly identify the correct lake than PD patients without psychotic symptoms ( $p=.006$ ) and controls ( $p=.043$ ; mean probability correct: PD with psychotic symptoms: .57 (SE.03), PD without psychotic symptoms: .69 (SE.02), controls: .664 (SE.02)).

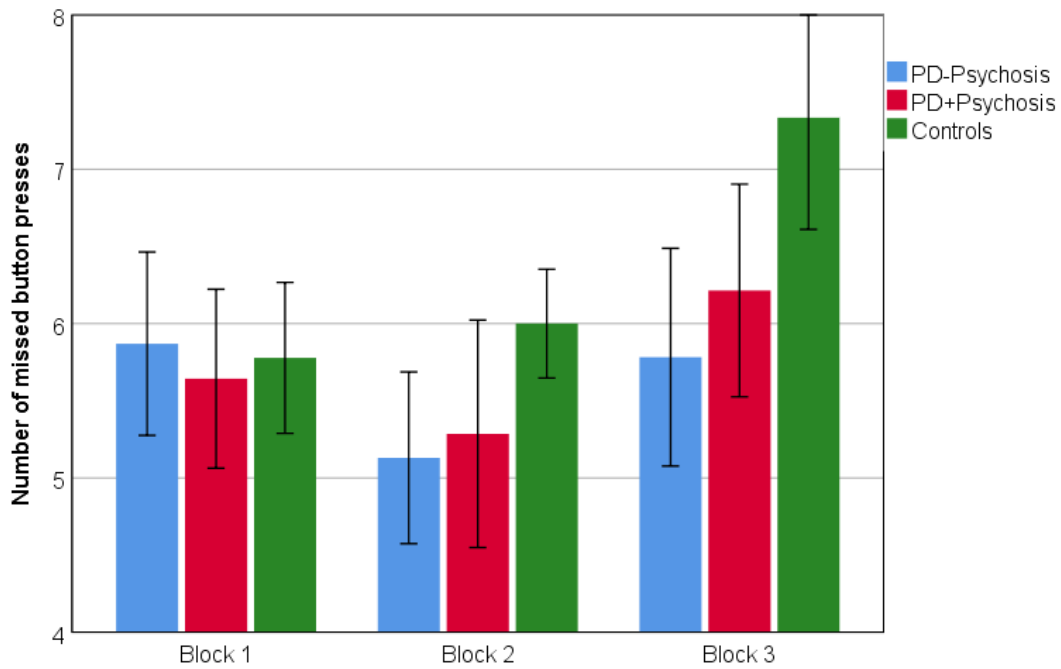

**Supplementary Figure 1.** Bar chart shows number of missed button presses across groups and testing blocks (error bar  $\pm 1$  SE).

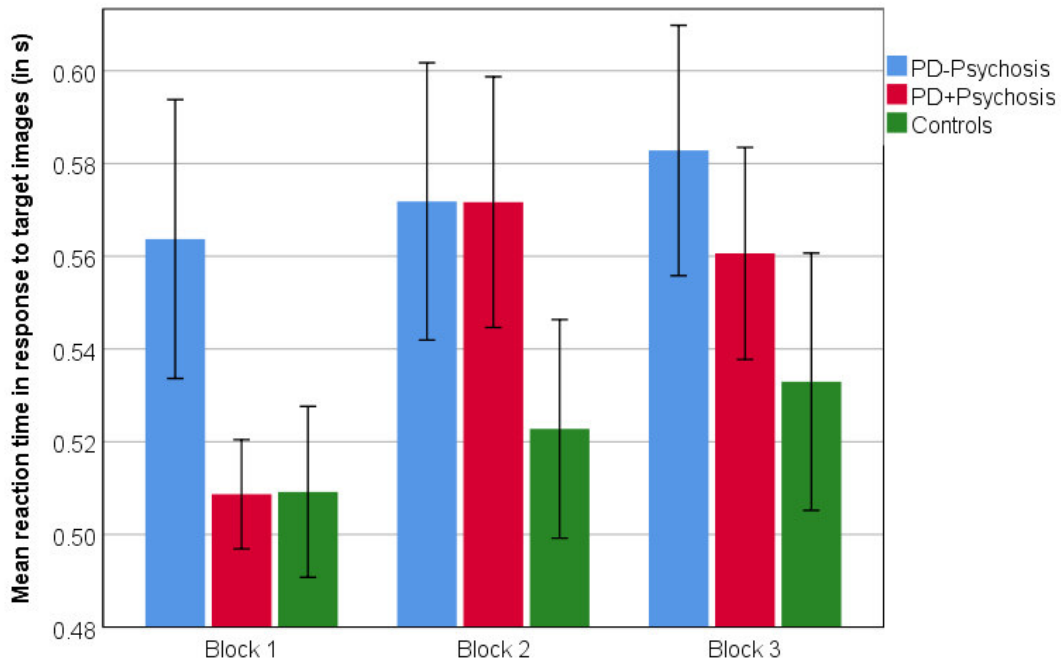

**Supplementary Figure 2.** Bar chart shows mean reaction times across groups and testing blocks (error bar  $\pm 1$  SE).

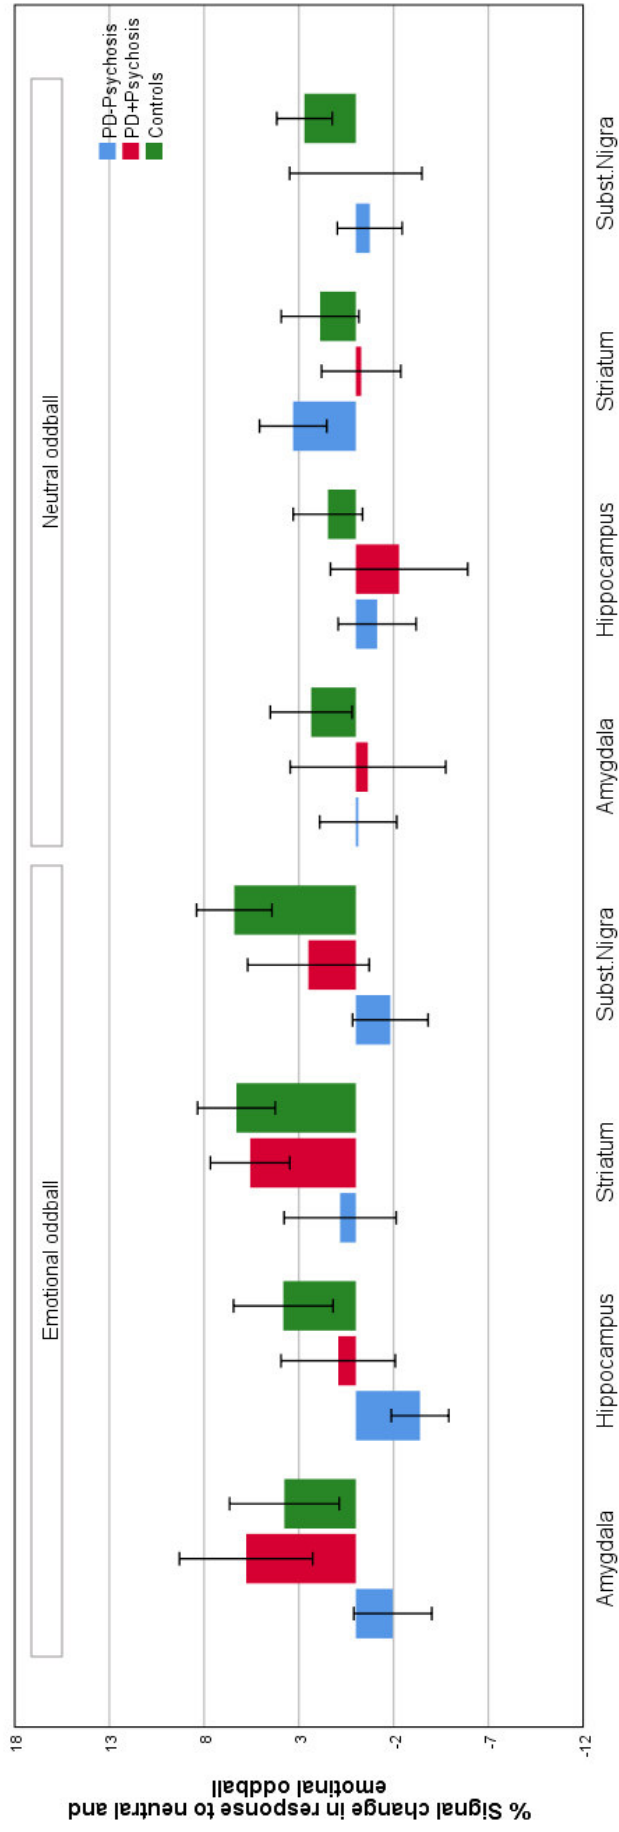

**Supplementary Figure 3.** Parameter estimates (% signal change) in response to emotional and neutral oddball samples separately. The parameter estimates indicate the potential drivers of the COPE (contrast of parameter estimates) effect (error bar  $\pm 1$  SE).
